# Supplementary material
Source: Springer Nature journal article supplement (https://www.springermedizin.de/resource/supplementary/12970_2007_37_MOESM1_ESM.pdf/9594260)

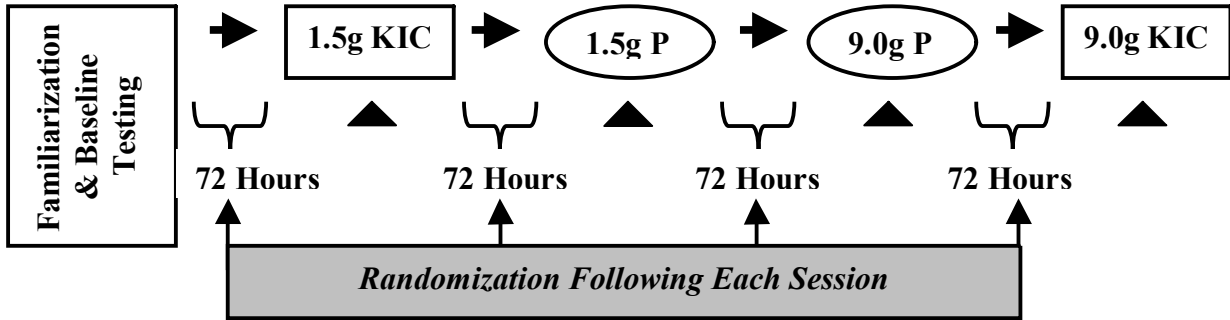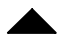

Performance Testing: 50% 1RM leg and chest press, 30s vertical jump test

Supplement: MOESM1 [file 9594260]
